# Supplementary material for: Changesin biomass burning, wetland extent, oragriculture drive atmospheric NH 3 trends in several African regions
Source: Copernicus journal article supplement (doi:10.5194/acp-2020-945), 2020-11-25
Supplement: Supplementary file 1 [file acp-2020-945-supplement.pdf]

1 **Supplemental Information**

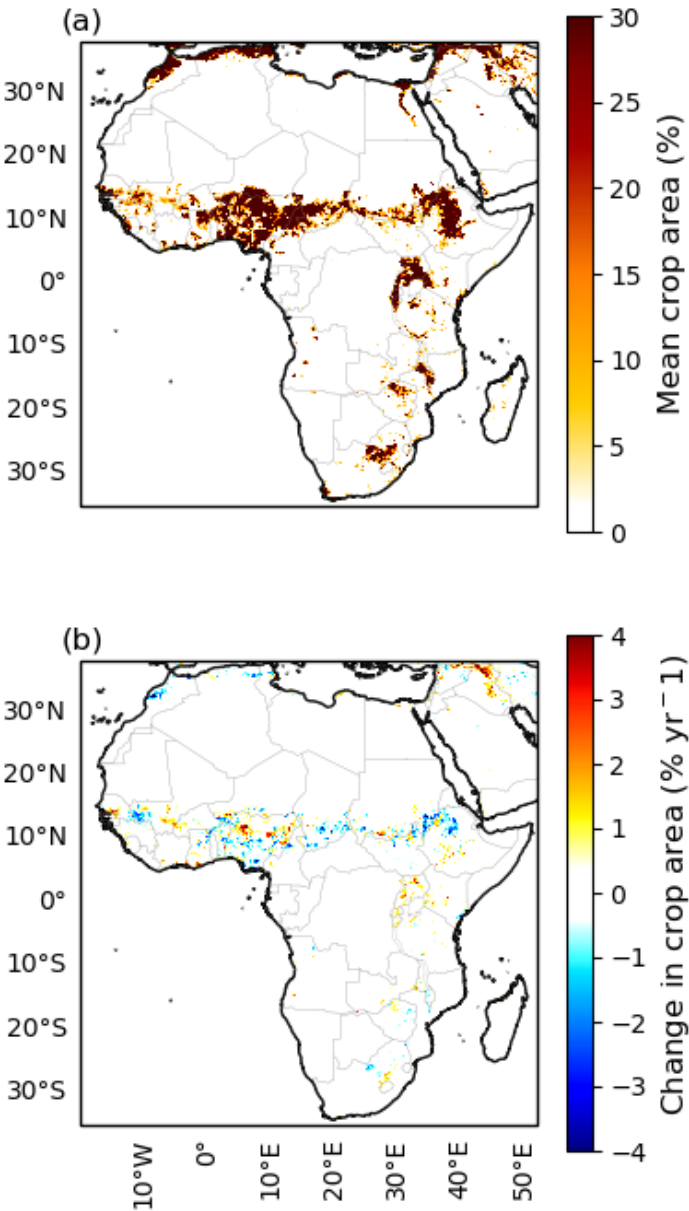

2  
3 **Figure S1.** Mean (a) and trend (b) in percentage of land area covered by crops or mosaics  
4 of crops and natural vegetation for 2008 through 2017.

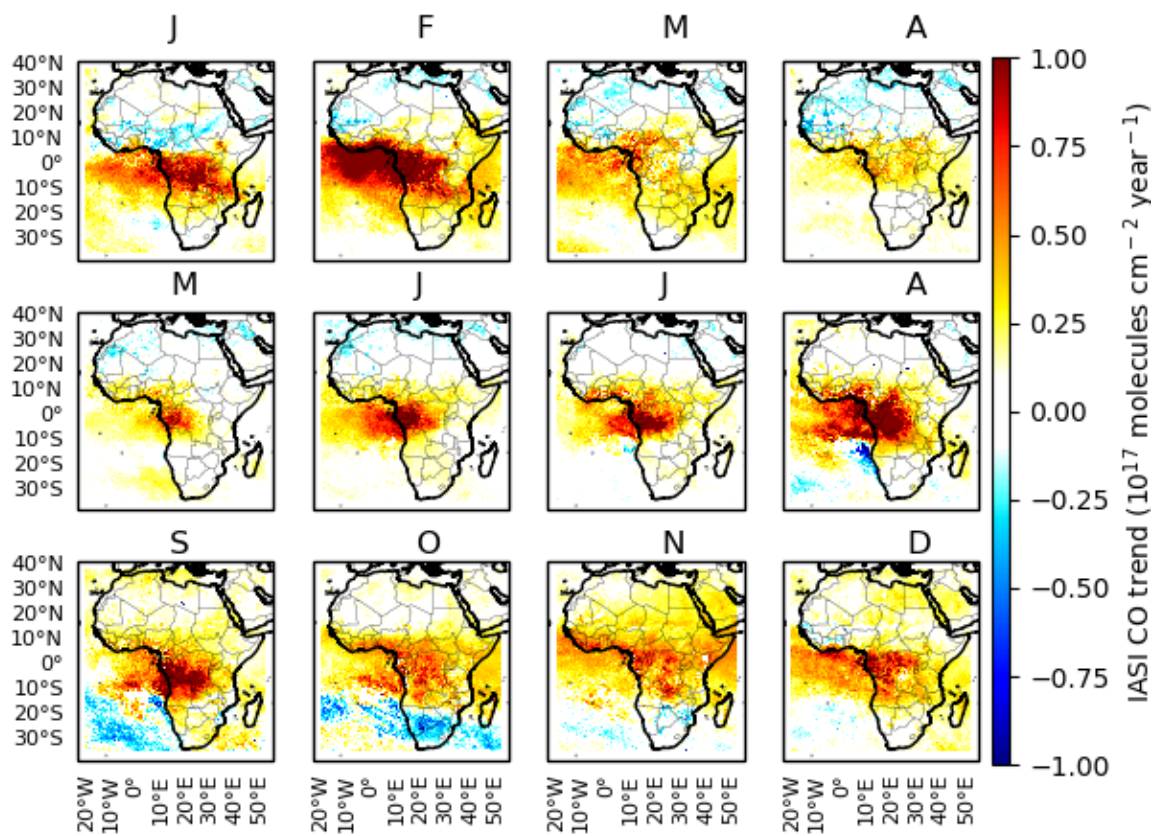

**Figure S2.** Change in mean monthly atmospheric CO VCDs for the period 2008 through 2017.

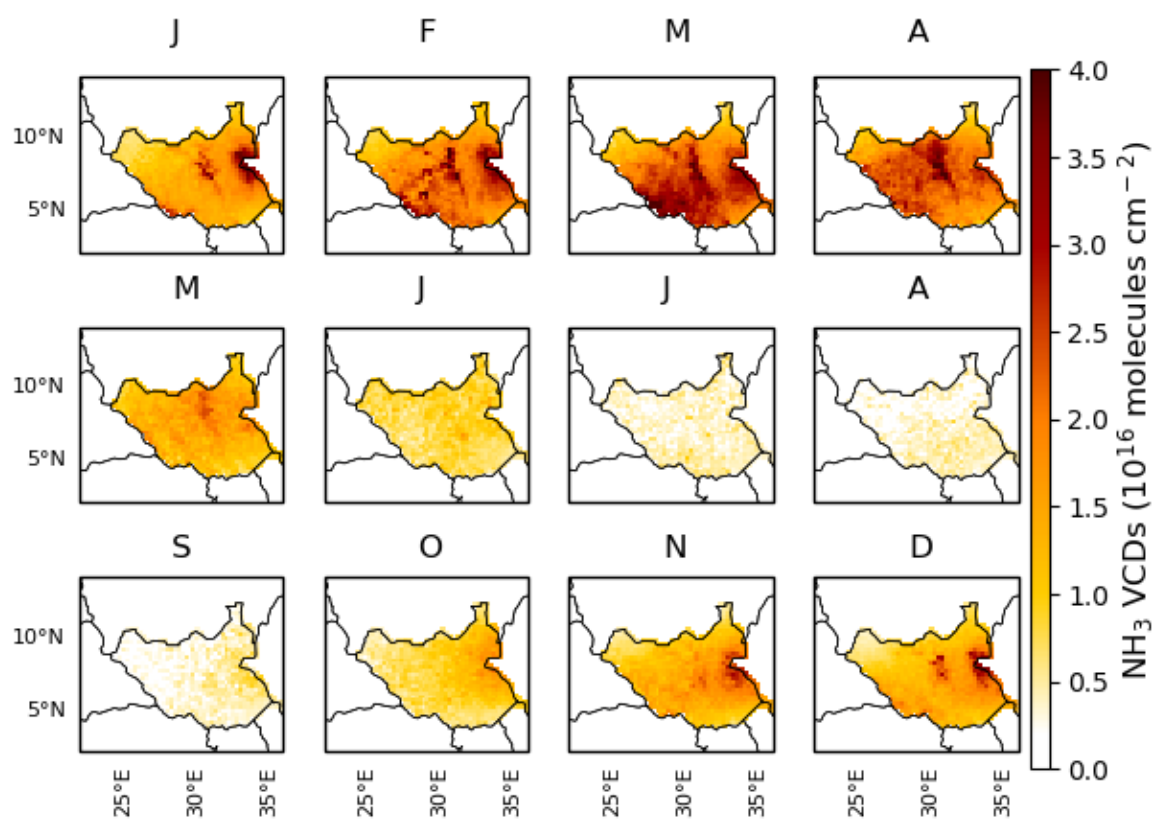

**Figure S3.** Mean monthly atmospheric  $\text{NH}_3$  VCDs over South Sudan; mean is for the period 2008 through 2017.

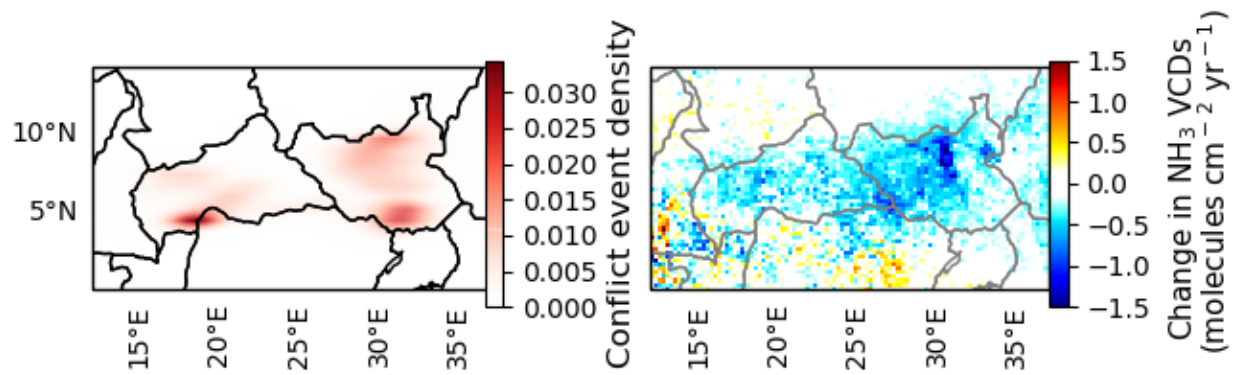

**Figure S4.** Kernel density estimate of conflict events (left) and change in NH<sub>3</sub> concentrations (right) between 2008 and 2017. Conflict data are from the Armed Conflict Location and Event Project (Raleigh et al., 2010; acleddata.com), and includes both violent and non-violent events.

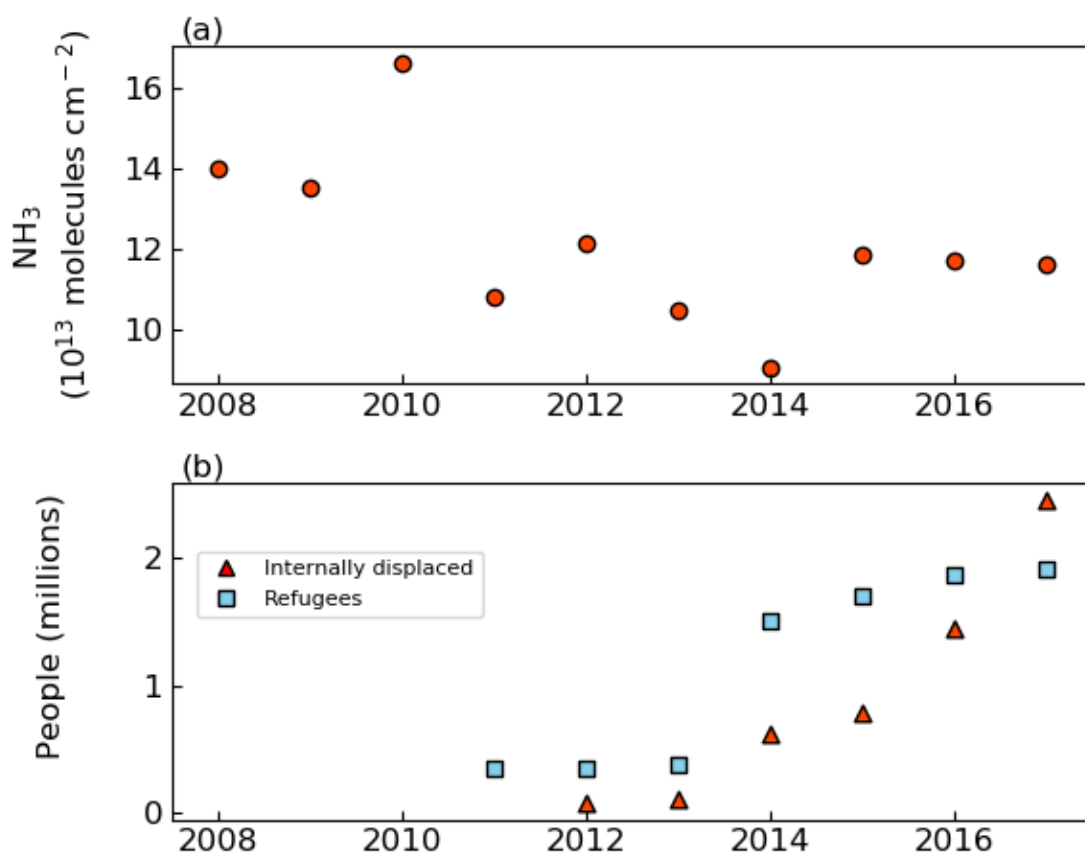

**Figure S5.** Mean annual  $\text{NH}_3$  VCDs (a) and mean annual refugees and internally displaced people (b) in South Sudan through 2017.

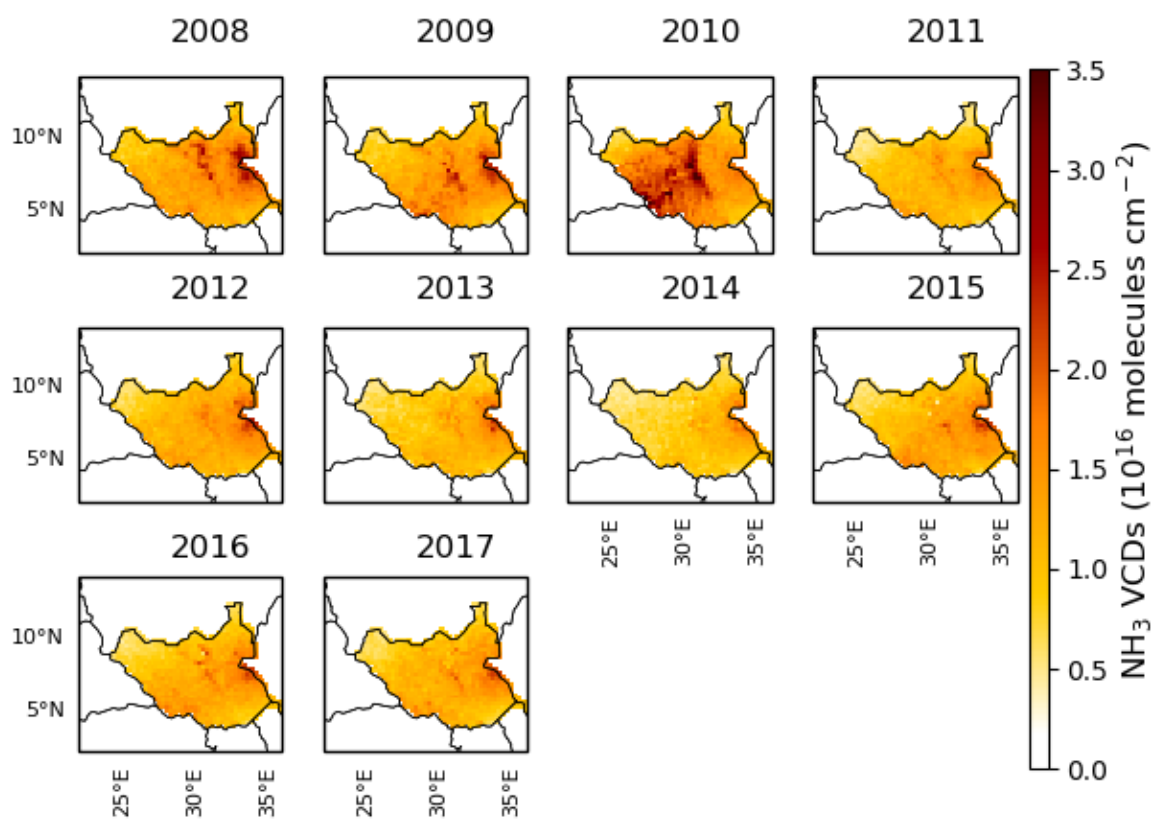

**Figure S6.** Mean annual atmospheric  $\text{NH}_3$  VCDs over South Sudan for 2008 through 2017.

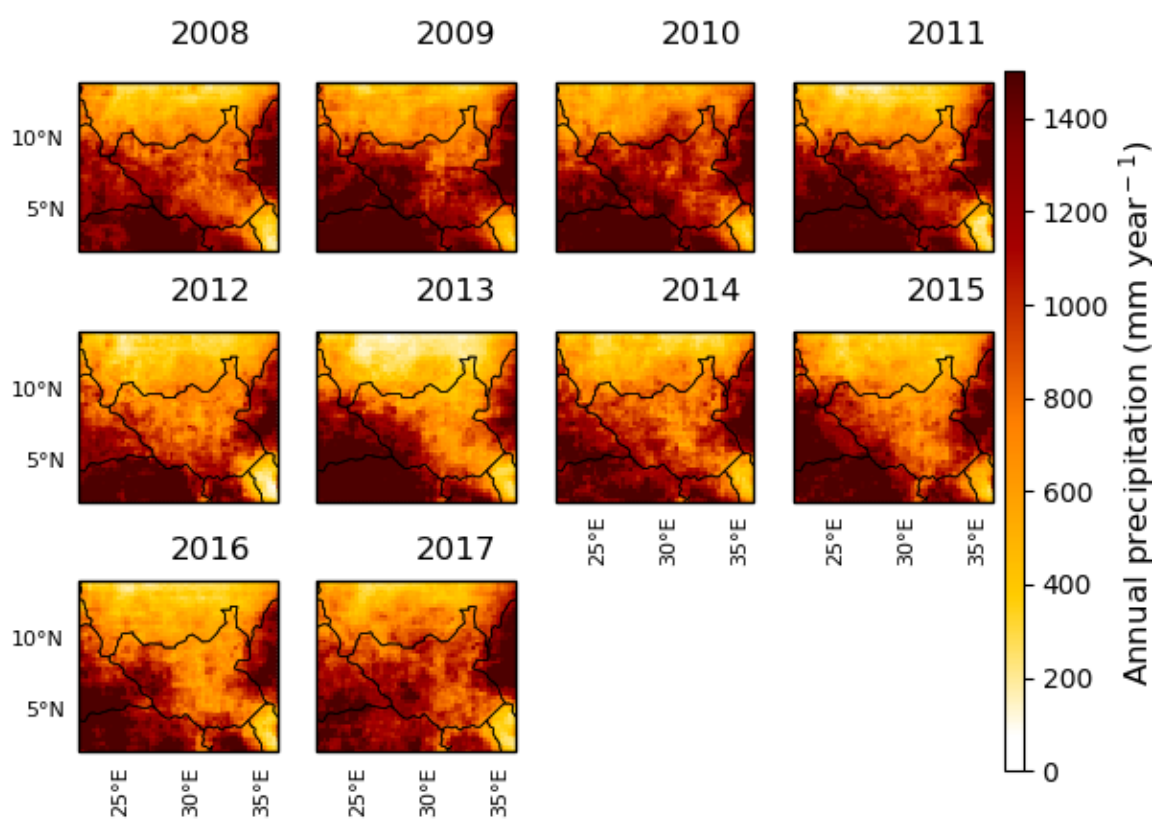

**Figure S7.** Mean annual precipitation over South Sudan for 2008 through 2017

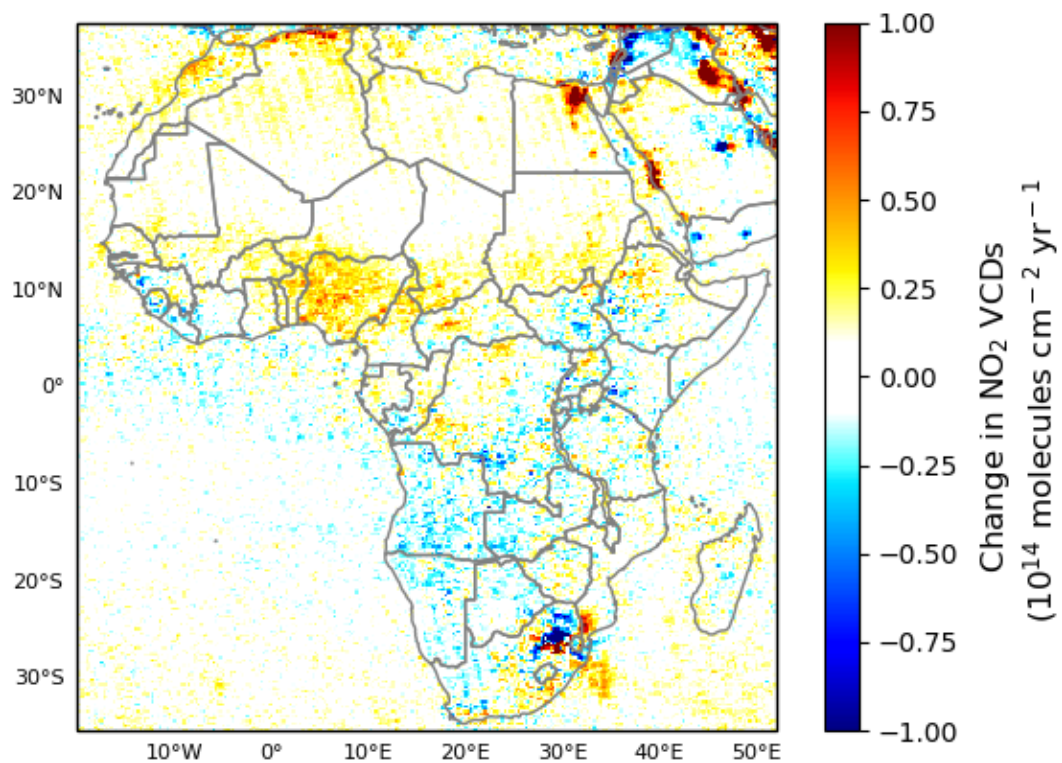

30  
 31 **Figure S8.** Change in mean annual tropospheric NO<sub>2</sub> VCDs over Africa, 2008 through 2017.



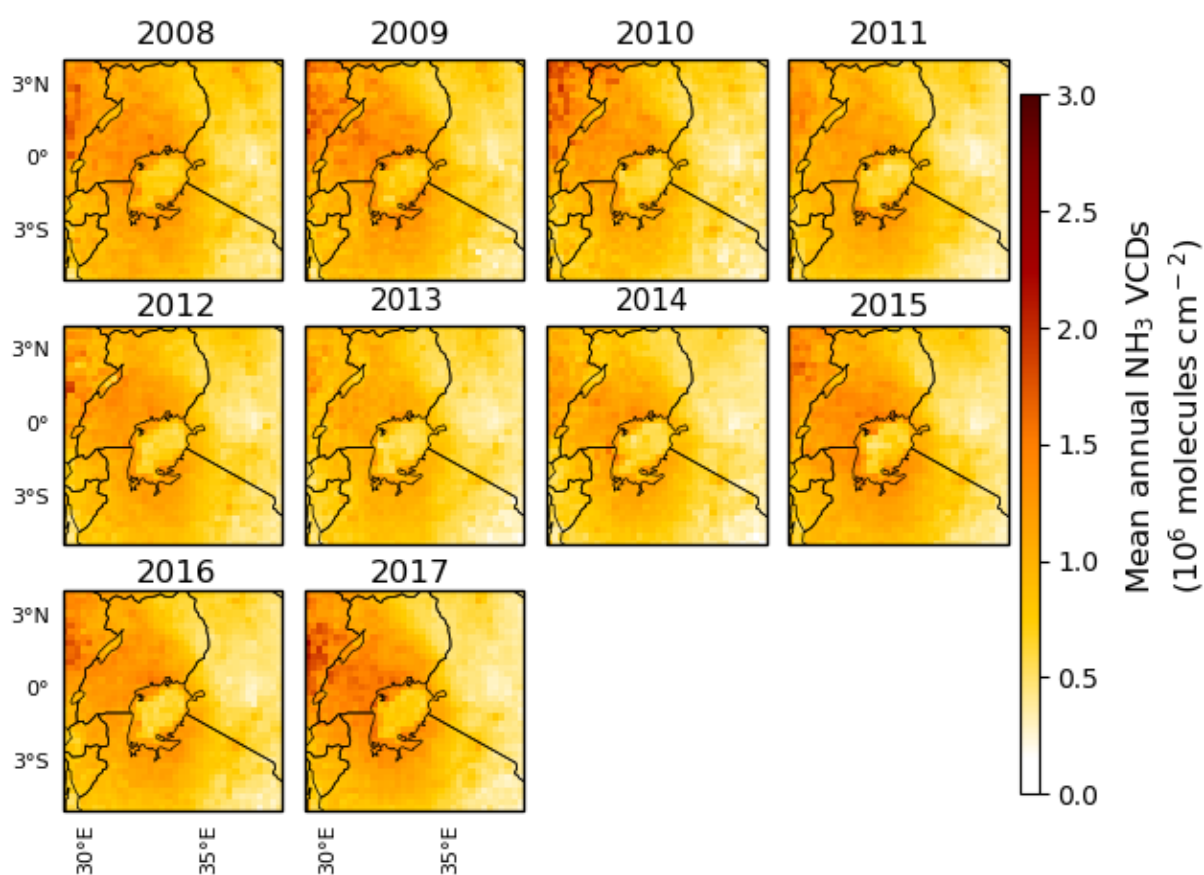

**Figure S9.** Mean annual atmospheric  $\text{NH}_3$  VCDs over the Lake Victoria region for 2008 through 2017.

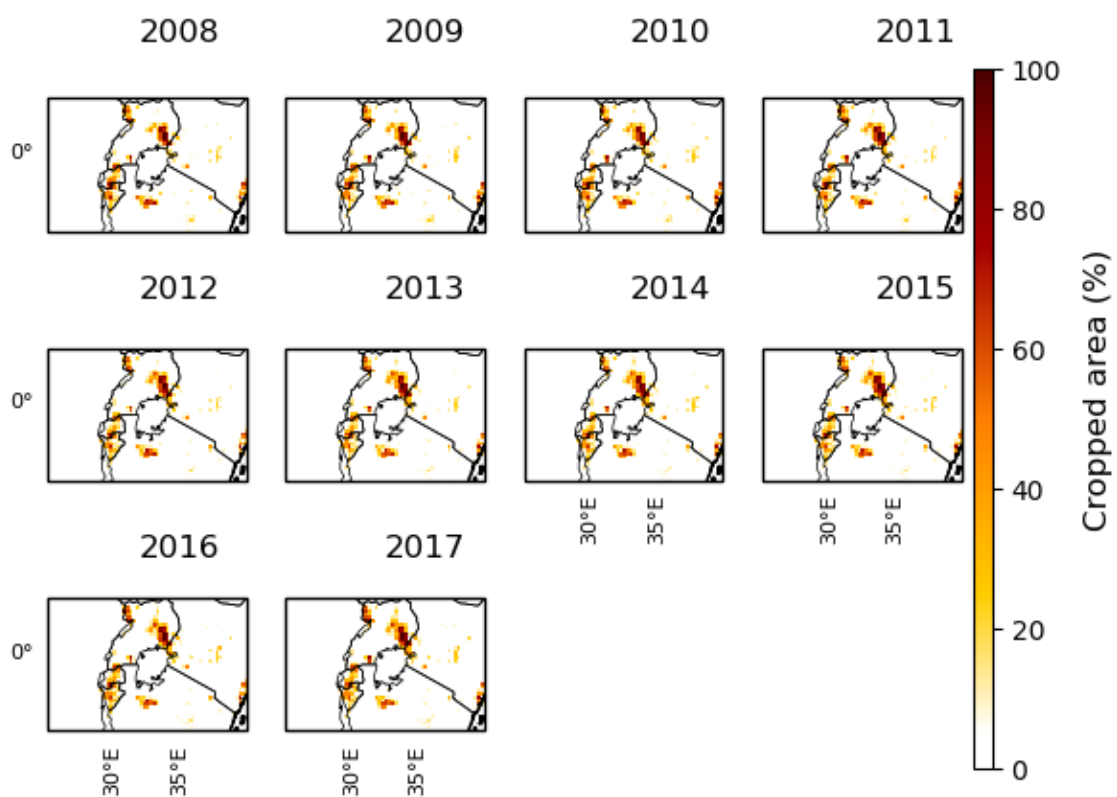

**Figure S10.** Cropped area in the Lake Victoria region for 2008 through 2017.

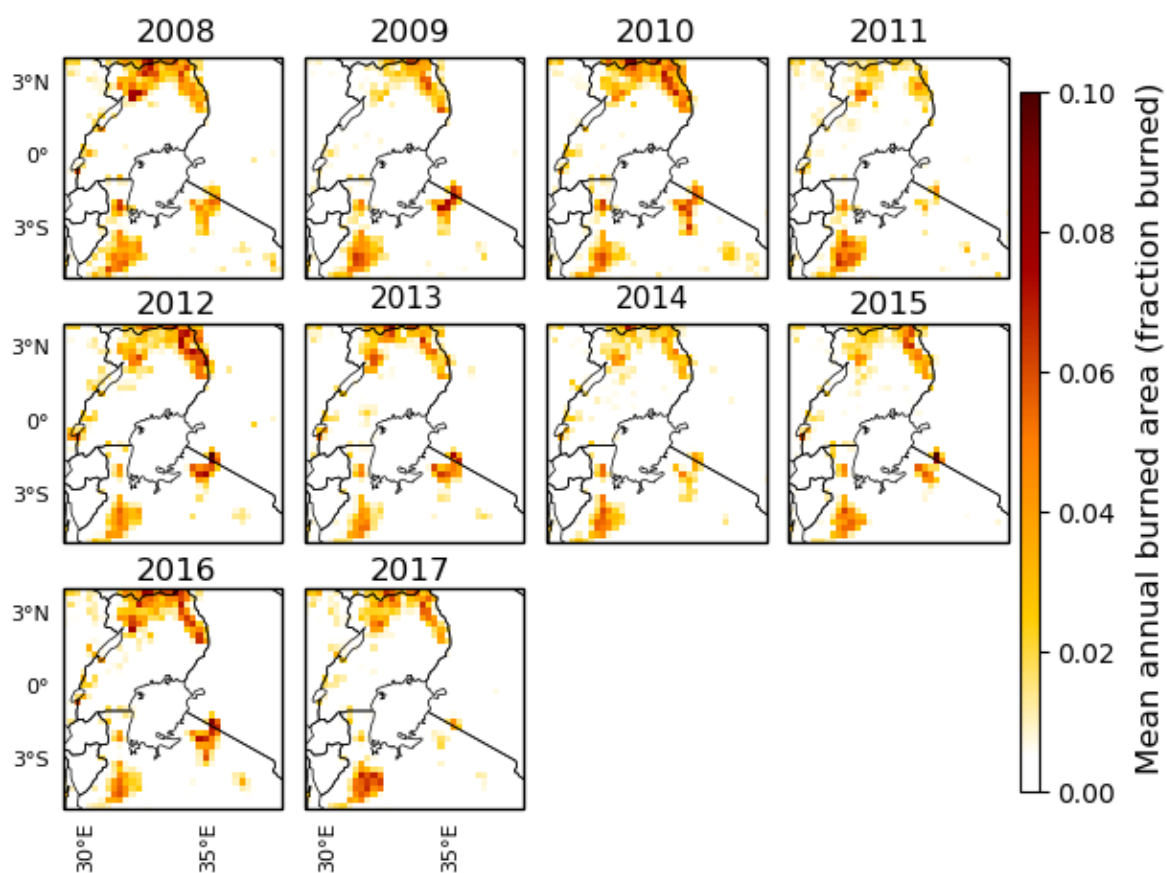

**Figure S11.** Total annual burned area in the Lake Victoria region for 2008 through 2017.

42 **Table S1.** List of countries in Low, Medium, and High bins in Figure 8.

| Low bin        | Medium Bin                  | High Bin             |
|----------------|-----------------------------|----------------------|
| Eswatini       | Angola                      | Mauritania           |
| South Africa   | Western Sahara              | Guinea-Bissau        |
| Lesotho        | Kenya                       | Burundi              |
| Somalia        | Central African<br>Republic | Cameroon             |
| Madagascar     | Chad                        | Guinea               |
| Djibouti       | Zambia                      | Mali                 |
| Namibia        | Tanzania                    | Rwanda               |
| Libya          | Malawi                      | Sierra Leone         |
| Eritrea        | Tunisia                     | Burkina Faso         |
| Botswana       | DRC                         | Nigeria              |
| South Sudan    | Niger                       | Benin                |
| Egypt          | Algeria                     | Togo                 |
| Mozambique     | Uganda                      | Cote d'Ivoire        |
| Sudan (former) | Senegal                     | Ghana                |
| Sudan (former) | Gambia                      | Gabon                |
| Zimbabwe       | Morocco                     | Liberia              |
| Ethiopia       | Congo                       | Equatorial<br>Guinea |

43
